# Supplementary material
Source: publisher site journal article supplement (https://www.spandidos-publications.com/7132/downloadSupplementary)
Supplement: Supplementary file 1 [file downloadSupplementary]

## Sheet: Sheet1
Table SIX. Associations among EGFR mutations, TP53 mutations, KRAS mutations, 5 demographic features, 3 conventional serum biomarkers, and 18 heavy metals were examined in NSCLC patients without hypertension (n=42).
Tumor_Sample_Barcode	EGFR status ("0" means patients without EGFR mutations, "1" means patients with EGFR mutations)	TP53 status ("0" means patients without TP53 mutations, "1" means patients with TP53 mutations)	KRAS status ("0" means patients without KRAS mutations, "1" means patients with KRAS mutations)	Gender ("0" means males, "1" means females)	Smoking ("0" means patients without a history of smoking, "1" means smokers)	Drinking ("0" means patients without a history of drinking, "1" means drinkers)	Age (year)	BMI (kg/m^2)	CEA (ng/mL)	CYFRA21-1 (ng/mL)	NSE (ng/mL)	As (μg/L)	Ba (μg/L)	Cd (μg/L)	Cr (μg/L)	Co (μg/L)	Cu (μg/L)	Ga (μg/L)	Mn (μg/L)	Hg (μg/L)	Ni (μg/L)	Pb (μg/L)	Se (μg/L)	Sn (μg/L)	Sb (μg/L)	Sr (μg/L)	Tl (μg/L)	V (μg/L)	Zn (μg/L)
BT2110220277LNCTB	1	1	0	1	0	0	66	23.0112	1.2	4.03	10.6	2.61	58.71	0.23	3.43	0.13	1249.27	0.37	13.11	1.43	1.68	8.38	235.55	0.01	0.17	37.58	0.01	0.46	16.06
BT2011140127LNCTB	1	1	0	0	1	1	58	26.6436	2.7	3.46	9.5	0.96	46.15	1.54	1.74	0.01	956.66	0.01	7.28	0.01	0.56	15.43	107.46	0.01	0.01	25.63	0.02	0.21	4.83
BT2011070119LNCTB	1	0	0	0	0	0	59	27.9297	1.1	2.15	21.27	15.93	80.8	1.69	2.16	0.1	841.1	0.54	11.99	0.01	0.17	12.06	132.89	0.01	0.11	44.97	0.01	0.32	8.72
BT2010160020LNCTB	1	1	0	1	0	0	62	22.0386	64.66	21.69	23.19	2.5	13.88	0.2	1.6	0.14	1171.19	0.15	14.57	0.01	1.53	7.21	99.1	0.01	0.03	35.24	0.01	0.11	5.55
BT2008020026LNCTB	1	1	0	1	0	0	53	20.3125	1.69	1.93	7.38	20.72	90.95	0.41	3.28	0.17	743.95	0.34	11.77	0	1.28	10.38	193.62	0	0.09	34.99	0	0.53	4.16
BT2007280097LNCTB	0	0	0	0	1	0	65	22.4059	4.73	6.34	14.56	15.96	75.48	1.84	1.96	0.12	1088.89	0.03	9.33	0	0.05	16.62	148.13	0	0.43	32.02	0	0.32	6.37
BT2007280095LNCTB	0	0	0	0	0	0	61	25.0399	2.16	4.38	9.73	11.91	69.61	0.14	2.77	0.15	883.74	0.18	10.8	0	0.32	9.8	156.35	0	0.32	27.72	0	0.28	6.24
BT2006250073LNCTB	1	0	0	0	1	0	65	27.7778	15.28	6.51	13.28	38.66	99.39	1.58	2.38	0.1	790.76	0.33	10.3	0	0.06	11.72	203.21	0	0.18	36.81	0	0	5.76
BT2006240077LNCTB	0	0	0	1	0	0	65	22.3133	1.46	1.64	6.121	17.13	55.29	0.37	1.88	0	814.97	0.08	13.14	0	0.03	6.58	141.38	0	0	37.98	0	0	3.79
BT2006060106LNCTB	1	0	0	1	0	0	62	21.4844	1.65	2.7	9.474	15.16	71.51	0.8	2.76	0	939.39	0	15.44	0	1.17	16.08	181.97	0	0	34.95	0	0.04	5.96
BT2006040272LNCTB	1	0	0	0	1	1	46	21.1463	3.63	4.34	4.61	12.27	76.12	1.02	2.11	0	1195.9	0	12.82	0	0	23.5	221.72	0	0.22	40.83	0	0.79	4.44
BT2005230002LNCTB	0	0	0	0	1	1	62	25.9516	1.45	4.28	6.43	26.55	107.6	0.35	1.4	0.07	1205.94	0	9.95	0	0.56	14.43	113.92	0	0	30.93	0	0	7.93
BT2005170154LNCTB	0	0	1	0	0	0	56	25.7959	5.68	1.47	8.16	1.25	64.09	3.7	2.82	0.54	824.51	0.23	11.18	0	1.92	6.07	244.24	0	1.86	16.09	0	0.6	6.63
BT2004230123LNCTB	1	0	0	0	0	0	57	27.6817	0.01	5.66	7.28	1.55	0	0.25	1.58	0	755.69	0.29	11.62	0	0.97	4.51	198.84	0	1.18	9.01	0	0.04	5.88
BT2109020505LNCTB	1	1	0	1	0	0	54	20.0288	67.5	41.9	19.2	0.12	12.6	0.28	0.75	0.01	1035.88	0.01	4.98	0.01	0.01	7.18	84.18	0.01	0.01	11.16	0.01	0.01	10.11
BT2108100280LNCTB	0	1	0	0	1	1	57	23.5078	3.78	1.57	8	1.18	62.28	2.11	2.55	0.11	878.97	0.01	10.4	3.32	0.01	16.3	255.35	0.01	0.01	28.85	0.01	0.24	17.825
BT2108040364LNCTB	1	0	0	0	0	0	80	28.3447	2.2	3.21	8.67	4.69	46.15	0.4	2.24	0.05	840.35	0.01	15.69	0.01	0.01	13.21	251.28	0.01	0.01	36.5	0.01	0.01	15.22
BT2108030218LNCTB	0	1	1	0	1	0	62	18.0427	3.6	3.03	14.3	3.1	66.17	0.57	3.43	0.6	1049.91	0.44	17.89	0.48	1.86	19.59	310.24	0.35	0.07	34.51	0.65	0.62	19.83
BT2107190171LNCTB	0	0	0	0	1	1	62	24.6094	1.3	1.86	8.02	0.49	0.01	4.5	1.29	0.01	562.68	0.1	3.77	0.01	0.01	12.9	234.76	0.17	0.01	22.83	0.01	0.06	27.77
BT2106180325LNCTB	1	1	0	1	0	0	76	23.4375	8.64	1.58	8.73	0.92	0.5	0.07	2.55	0.01	1490.19	0.01	9.91	0.01	0.61	10.39	139.76	0.01	0.65	38.26	0.01	0.43	4.18
BT2106120367LNCTB	0	1	0	0	1	0	64	25.3906	2.5	9.35	24.1	1.49	0.68	0.53	2.9	0.11	1060.53	0.01	9.96	0.01	0.53	21.12	211.08	0.01	1.38	28.59	0.03	0.2	6.94
BT2106020054LNCTB	1	1	0	1	0	0	68	22.6562	24	20.8	13.35	1.5	0.01	0.46	1.8	0	1142.65	0.01	11.26	0.01	0.1	14.2	138.94	0.01	1.31	16.06	0.01	0.48	6.78
BT2104290440LNCTB	1	1	0	1	0	0	49	25.8022	1.17	1.98	12.51	0.66	53.39	0.53	1.23	0.06	978.64	0.01	8.43	0.01	0.26	3.91	174.93	0.01	0.01	19.73	0.01	0.38	5.32
BT2104160292LNCTB	1	0	0	1	0	0	49	20.3125	2.02	7.83	15.64	0.82	38.13	0.2	1.21	0.03	1130.51	0.09	10.38	0.01	0.72	5.89	177.95	0.01	0.01	24.77	0	0.17	5.1
BT2104100241LNCTB	1	1	0	0	0	0	69	19.6641	1.71	1.3	11.07	1.4	38.42	0.47	1.78	0.03	873.75	0.47	8.76	0.01	0.01	11.31	155.23	0.01	0.01	11.82	0.01	0.07	6.48
BT2012030228LNCTB	1	0	0	1	1	0	65	25.3906	2.9	2.7	11.82	1.36	61.13	0.75	2.35	0.12	899.7	0.01	9.59	0	0.61	10.51	138.06	0	0	18.07	0.14	0.12	5.97
BT2102200018LNCTB	1	0	0	1	0	0	57	27.3438	2.27	1.89	11.39	0.94	43.3	0.06	1.45	0.03	1010.89	0.23	13	0	0.79	10.1	192.75	0	0	21.83	0	0.06	6.96
BT2101090110LNCTB	1	1	0	1	0	0	54	24.2424	1.5	1.41	8.31	0.02	43.13	1.31	2.46	0.26	934.8	0.01	12.61	0.01	0.57	12.97	131.14	0.01	0.01	23.15	0.01	0	5.3
BT2101020185LNCTB	1	0	0	0	0	0	72	26.1962	5.3	1.85	8.63	1.74	36.72	0.14	1.83	0.03	791.07	0.01	5.15	0.01	0.47	4.65	165.27	0.01	0.01	21.13	0.04	0.17	5.62
BT2012120219LNCTB	0	1	0	1	0	0	51	21.6713	3.7	1.78	8.07	1.3	49.5	0.19	2.15	0.01	841.93	0.15	14.96	0.01	0.59	6.96	163.86	0.01	0.01	25.71	0.04	0.11	4.91
BT2012030232LNCTB	0	1	1	1	0	0	63	22.6003	0.7	4.19	10.1	0.35	42.2	0.51	2.35	0.13	988.14	0.09	13.49	0	0.98	22.03	147.65	0	0	31.26	0.12	0.19	5.48
BT2011220003LNCTB	1	1	0	1	0	0	66	23.7954	7.31	1.55	11.77	0.57	40.5	0.2	1.83	0.01	873.6	0.01	14.28	0.01	0.57	2.3	155.28	0.01	0.01	22.15	0.01	0.3	4.44
BT2004190121LNCTB	1	0	0	1	0	0	61	22.8624	0.2	1.15	2.04	0.82	0.86	0.77	2.22	0.05	933.15	0	14.7	0	0.79	3.75	200.13	0	1.44	10.86	0	0.09	6.7
BT2004090004LNCTB	1	1	0	1	0	0	63	20.1951	25.71	1.01	3.78	0.86	3.02	0.86	2.34	0	1206.82	0	15.51	0	0.74	5.98	221.01	0	2.07	22.14	0	0.16	6.05
BT2003300077LNCTB	1	1	0	1	0	0	47	26.1719	1.79	2.15	11.73	0	0	3.61	1.75	0.84	965.38	0.18	19.34	0	1.72	8.03	284.89	0	1.17	13.57	0	1.36	6.78
BT2001200064LNCTX	1	0	0	1	0	0	63	17.2584	1.85	52.37	42.2	1.88	0.44	1.66	0.51	0.22	1292.65	0	11.13	0	0	28.33	142.6	0	2.68	10.15	0	0	5.55
BT2001170233LNCTB	1	0	0	0	1	1	57	18.6012	2.68	18.37	14.43	81.88	0	0	0.39	0.12	893.69	0	4.41	0	2.52	18.6	191.78	0.08	3.05	39.91	0	0.28	4.03
BT1912190271LNCTB	1	1	0	0	0	0	73	23.4375	10.55	5.25	10.47	1.45	2	0.36	0	0	919.52	0	8.28	0	0.23	9.44	212.82	0.14	0.48	18.38	0	0	6.75
BT1912050217LNCTB	1	1	0	1	0	0	62	19.9481	2.66	2.1	16.86	0.93	1.77	1.04	1.9	0.08	1211.45	0	17.68	0	0.81	4.48	241.52	0	2.51	25.25	0	0.27	7.87
BT1911140025LNCTB	1	1	0	1	0	0	53	20.4294	94.59	4.79	12.72	4.13	3.72	1.5	0	0.13	1102	0.19	26.5	0	0	7.37	183.74	0	2.25	15.87	0	0.8	5.43
BT1911070053LNCTB	1	0	0	0	0	0	69	21.0938	1.65	11.61	10.37	1.24	1.39	0.35	1.55	0.06	743.18	0.21	10.35	0	0.43	16.31	215.7	0.37	1.16	16.36	0	0.29	5.93
BT1910310053LNCTB	0	0	0	1	0	0	50	30.4688	1.65	5.12	12.26	1.77	1.52	0.55	0.68	0.08	1044.95	0.44	19.95	0	1.61	14.64	236.43	0.04	1.55	18.38	0	0.16	8.27
